# Supplementary material
Source: PubMed Central journal article supplement (PMC3697630)
Supplement: JB.00237-13_zjb999092673so1.pdf [file JB.00237-13_zjb999092673so1.pdf]

**Table S1.** The list of primers used in this work. All primer sequences are in 5'-3' orientation.

| Primers for cloning TA components                                                          |                           | Target                                                    |
|--------------------------------------------------------------------------------------------|---------------------------|-----------------------------------------------------------|
| F_AbTRel1                                                                                  | CATGAGTTACGAGCTAGAGTTCTC  | RelE <sub>Ab</sub>                                        |
| R_AbTRel1                                                                                  | GATTTATGCAACAAGCTTAAGGATG | RelE <sub>Ab</sub> , introduces HindIII site              |
| F_AbAREl1                                                                                  | CATGAGAAACGTCATGAACCACA   | RelB <sub>Ab</sub>                                        |
| R_AbAREl1                                                                                  | ATTGCTTCAAGCTTACGAATAAAC  | RelB <sub>Ab</sub> , introduces HindIII site              |
| F_AbHicT                                                                                   | TCTTTCTGCAGCAATTGGATACAAC | HicA <sub>Ab</sub> , introduces PstI site                 |
| NR_AbHicT                                                                                  | CGTGAAAAGTCTGGATTTAGTCAAA | HicA <sub>Ab</sub>                                        |
| F_AbHicB                                                                                   | GGGAAATAAAAAAGCTTCTCGATTG | HicB <sub>Ab</sub> , introduces HindIII site              |
| R_AbHicB                                                                                   | CGTGAGTGCAATGTTGTATCCAAT  | HicB <sub>Ab</sub>                                        |
| F_AbGPtox                                                                                  | CGTTGTAAGCTTTCAGGTGAGCG   | GP49 <sub>Ab</sub> , introduces HindIII site              |
| R_AbGPtox                                                                                  | CATGGCTTGGGATGTAGAAACAA   | GP49 <sub>Ab</sub>                                        |
| F_AbGPant                                                                                  | TTAACACAAGCTTTTAGGTCTAT   | Cro <sub>Ab</sub> , introduces HindIII site               |
| R_AbGPant                                                                                  | CATGGCTAAATTAACGATATAA    | Cro <sub>Ab</sub>                                         |
| F_AbTRtox                                                                                  | CATGTTTTTTATGGAACAGTATTTT | DUF497 <sub>Ab</sub>                                      |
| R_AbTRtox                                                                                  | CTTTAGCAAGCAAGCTTTGAATT   | DUF497 <sub>Ab</sub> , introduces HindIII site            |
| F_AbTRant                                                                                  | CATGGTTAGATACTCACACAAAGA  | COG3514 <sub>Ab</sub>                                     |
| R_AbTRant                                                                                  | GCATAAAACAACCAAGCTTAATGTT | COG3514 <sub>Ab</sub> , introduces HindIII site           |
| F_AbGNanti                                                                                 | CATGCGAAAAACAGAAGTTTATCAG | HTH <sub>Ab</sub>                                         |
| R_AbGNanti                                                                                 | ACAAAGAAAGCTTAACTAAAAAAGA | HTH <sub>Ab</sub> , introduces HindIII site               |
| F_AbGnaT                                                                                   | CATGATTGTAAGACGAGCGACCT   | GNAT <sub>Ab</sub>                                        |
| R_AbGnaT                                                                                   | AGTTAAAAGCTTGATTGCAGCCG   | GNAT <sub>Ab</sub> , introduces HindIII site              |
| F_AbZetacl                                                                                 | CATGGTAACAAATAATTTTGGAA   | Zeta <sub>Ab</sub>                                        |
| R_AbZetacl                                                                                 | AATTACATCTGCAGCAAATAATA   | Zeta <sub>Ab</sub> , introduces PstI site                 |
| F_AbX                                                                                      | CATGGAAAATCTTTATTTTTTTAAC | X <sub>Ab</sub>                                           |
| F_pBAD                                                                                     | TGTAACAAAGCGGGACCAAAGC    | pBAD30 plasmid, behind cloning site                       |
| R_pBAD                                                                                     | GGCGTTTCACTTCTGAGTTCGG    | pBAD30 plasmid, after cloning site                        |
| F_pUH                                                                                      | CAAAAAGAGTGTGACTTGTGAGCG  | pUH25-2 plasmid, behind cloning site                      |
| R_pUH                                                                                      | GATCTATCAACAGGAGTCCAAGCTC | pUH25-2 plasmid, after cloning site                       |
| F_pUHXba                                                                                   | AACAATTCATCTAGAATTCATTA   | pUH25-2 plasmid, behind cloning, introduces XbaI site     |
| Primers for detection and screening of TA systems in clinical <i>A. baumannii</i> isolates |                           |                                                           |
| Fbau_Rel                                                                                   | TGTATGAACGCATGATGGATC     | Screening for RelB <sub>Ab</sub> /RelE <sub>Ab</sub>      |
| Rbau_Rel                                                                                   | AGCTTATTCTTCGGTATCTTAGG   | Screening for RelB <sub>Ab</sub> /RelE <sub>Ab</sub>      |
| F_HicABins                                                                                 | GGTAAAGTAACATTGATTTTTTCTG | Screening for HicA <sub>Ab</sub> /HicB <sub>Ab</sub>      |
| R_HicABins                                                                                 | CATTTTGAAGCAAGCGGGTCTAA   | Screening for HicA <sub>Ab</sub> /HicB <sub>Ab</sub>      |
| F_GPCroIns                                                                                 | AATATGAAAGAGCTACGTGTTC    | Screening for GP49 <sub>Ab</sub> /Cro <sub>Ab</sub>       |
| R_GPCroIns                                                                                 | CCCATTGCTTCAACATACTTTTT   | Screening for GP49 <sub>Ab</sub> /Cro <sub>Ab</sub>       |
| F_AbTRtox                                                                                  | CATGTTTTTTATGGAACAGTATTTT | Screening for DUF497 <sub>Ab</sub> /COG3514 <sub>Ab</sub> |
| R_DufCogins                                                                                | TTGATGATTTTTTAATTCTTTTAGC | Screening for DUF497 <sub>Ab</sub> /COG3514 <sub>Ab</sub> |
| F_AbGNanti                                                                                 | CATGCGAAAAACAGAAGTTTATCAG | Screening for HTH <sub>Ab</sub> /GNAT <sub>Ab</sub>       |
| R_HTHGnatins                                                                               | TTAAGAAAACAATGAAATGTCTGG  | Screening for HTH <sub>Ab</sub> /GNAT <sub>Ab</sub>       |
| Fbau_Zeta                                                                                  | TCTAGTTTGAATTCGGAAGAAA    | Screening for Zeta <sub>Ab</sub>                          |
| Rbau_Zeta                                                                                  | TTATCTGTCTAGTTCTACGCCA    | Screening for Zeta <sub>Ab</sub>                          |
| Fbau_Rel2                                                                                  | GATGAAGCCCTTAAAGAAAAATC   | Screening for RelB <sub>Ab</sub> /RelE <sub>Ab</sub> 2    |
| Rbau_Rel2                                                                                  | GTGATGAGCAAGATAACTACCT    | Screening for RelB <sub>Ab</sub> /RelE <sub>Ab</sub> 2    |

|          |                           |                                                      |
|----------|---------------------------|------------------------------------------------------|
| Fbau_Yoe | TCTGTTTTAGATAAAGTAATTGAT  | Screening for Phd <sub>Ab</sub> /YoeB <sub>Ab</sub>  |
| Rbau_Yoe | TCGACATTGAATTATAGAGATTC   | Screening for Phd <sub>Ab</sub> /YoeB <sub>Ab</sub>  |
| F_YbauN  | TTTCAAAGCTTCGAGCGATAGTC   | Screening for RelB <sub>Ab</sub> /YafQ <sub>Ab</sub> |
| Rbau_Yaf | ATGGCTAAACGTAAGATTATCGTAA | Screening for RelB <sub>Ab</sub> /YafQ <sub>Ab</sub> |

Primers for probes of Northern analysis

---

|         |                         |                        |
|---------|-------------------------|------------------------|
| lppF2   | TATATCGAAGCGCCCTGATGGGC | <i>lpp</i> transcript  |
| lppR2   | CACGAGCTGCGTCATCTTTA    | <i>lpp</i> transcript  |
| F_tmRNA | GGGGCTGATTCTGGATTCGACG  | <i>ssrA</i> transcript |
| R_tmRNA | TGGTGGAGCTGGCGGGAGTT    | <i>ssrA</i> transcript |

---

**Table S2.** The GI codes of psi-BLAST and TBLASTN input for TA search\* based on the homology.

| TA                                                 | toxin GI  | antitoxin GI | host                               |
|----------------------------------------------------|-----------|--------------|------------------------------------|
| AfuT2 <sub>DSM4304</sub> /AfuA2 <sub>DSM4304</sub> | 11499074  | 11499073     | <i>Archaeoglobus fulgidus</i>      |
| AtuT1 <sub>C58</sub> /AtuA1 <sub>C58</sub>         | 15888171  | 15888172     | <i>Agrobacterium tumefaciens</i>   |
| Axe-txe                                            | 32470464  | 32470465     | <i>Enterococcus faecium</i>        |
| BceT1 <sub>E33L</sub> /BceA1 <sub>E33L</sub>       | 52141794  | 52141791     | <i>Bacillus cereus</i>             |
| BceT5 <sub>E33L</sub> /BceA5 <sub>E33L</sub>       | 52140501  | 52140498     | <i>Bacillus cereus</i>             |
| Ccd <sub>F</sub>                                   | 9507756   | 9507755      | <i>Plasmid F</i>                   |
| ccd <sub>O157</sub>                                | 15799733  | 15799732     | <i>Escherichia coli</i>            |
| chpB                                               | 157157445 | 157156816    | <i>Escherichia coli</i>            |
| dinJ/yafQ                                          | 16128211  | 16128212     | <i>Escherichia coli</i>            |
| EcoT1 <sub>EDL933</sub> /EcoA1 <sub>EDL933</sub>   | 15802544  | 15802545     | <i>Escherichia coli</i>            |
| hicAB                                              | 87081911  | 145693129    | <i>Escherichia coli</i>            |
| hig                                                | 21233923  | 21233924     | <i>Proteus vulgaris</i>            |
| hip                                                | 16129466  | 16129467     | <i>Escherichia coli</i>            |
| MavT1 <sub>K10</sub> /MavA1 <sub>K10</sub>         | 41410367  | 41410366     | <i>Mycobacterium avium</i>         |
| MazEF /chpA                                        | 110642923 | 110642924    | <i>Escherichia coli</i>            |
| mvp                                                | 13449197  | 13449196     | <i>Shigella flexneri</i>           |
| NeuT1 <sub>C91</sub> /NeuA1 <sub>C91</sub>         | 114331792 | 114331793    | <i>Nitrosomonas eutropha</i>       |
| NspT1 <sub>PC7120</sub> /NspA1 <sub>PC7120</sub>   | 17228248  | 17228249     | <i>Nostoc</i> sp. PCC 7120         |
| NspT2 <sub>PC7120</sub> /NspA2 <sub>PC7120</sub>   | 17228000  | 17227999     | <i>Nostoc</i> sp. PCC 7120         |
| NspT5 <sub>PC7120</sub> /NspA5 <sub>PC7120</sub>   | 17231114  | 17231113     | <i>Nostoc</i> sp. PCC 7120         |
| paaR1-paaA1-parE1                                  | 15830321  | 15830322     | <i>Escherichia coli</i>            |
| parDE                                              | 15829716  | 15829715     | <i>Escherichia coli</i>            |
| ParDE3                                             | 16126988  | 16126989     | <i>Caulobacter crescentus</i>      |
| parDE <sub>RK2</sub>                               | 168998416 | 168998415    | Birmingham IncP-alpha plasmid      |
| pas                                                | 30027760  | 30027759     | <i>Acidithiobacillus caldus</i>    |
| Pem/parD                                           | 133756559 | 133756558    | <i>Escherichia coli</i>            |
| pezAT                                              | 81531989  | 81620431     | <i>Streptococcus pneumoniae</i>    |
| phd/doc                                            | 187736902 | 187736903    | <i>Escherichia coli</i>            |
| prlF/yhaV                                          | 16131022  | 16131021     | <i>Escherichia coli</i>            |
| RelBE2                                             | 16126752  | 16126753     | <i>Caulobacter crescentus</i>      |
| RelBE2Spn                                          | 15901085  | 15901086     | <i>Streptococcus pneumoniae</i>    |
| relBE <sub>307</sub>                               | 10955393  | 10955394     | <i>Escherichia coli</i>            |
| relBE <sub>K-12</sub>                              | 16129522  | 16129523     | <i>Escherichia coli</i>            |
| RPC4130/ RPC4129                                   | 90425605  | 90425604     | <i>Rhodospseudomonas palustris</i> |
| SmeT1 <sub>1021</sub> / SmeA1 <sub>1021</sub>      | 15964520  | 15964521     | <i>Sinorhizobium meliloti</i>      |
| SpeT3 <sub>TIGR4</sub> /SpeA3 <sub>TIGR4</sub>     | 15900772  | 15900771     | <i>Streptococcus pneumoniae</i>    |

|                                                |           |           |                                    |
|------------------------------------------------|-----------|-----------|------------------------------------|
| SpyT1 <sub>10270</sub> /SpyA1 <sub>10270</sub> | 94990855  | 94990856  | <i>Streptococcus pyogenes</i>      |
| SpyT1 <sub>M1</sub> /SpyA1 <sub>M1</sub>       | 15675208  | 15675209  | <i>Streptococcus pyogenes</i>      |
| SpyT2 <sub>10270</sub> /SpyA2 <sub>10270</sub> | 94990057  | 94990058  | <i>Streptococcus</i> phage 10270.1 |
| stbDE                                          | 190015809 | 190015808 | <i>Salmonella enterica</i>         |
| vapBC                                          | 45658497  | 45658496  | <i>Leptospira interrogans</i>      |
| vapXD                                          | 16272398  | 16272399  | <i>Haemophilus influenzae</i>      |
| yafNO                                          | 16128219  | 16128218  | <i>Escherichia coli</i>            |
| ydcDE                                          | 16077533  | 16077532  | <i>Bacillus subtilis</i>           |
| yefM/yoeB                                      | 94541116  | 90111372  | <i>Escherichia coli</i>            |
| ygiUT (mqsRA)                                  | 16130918  | 16130917  | <i>Escherichia coli</i>            |
| Zeta/Epsilon/Omega                             | 63021992  | 63021991  | <i>Streptococcus pyogenes</i>      |

---

\*Our query included TA proteins suggested as “original” TA pairs in bioinformatic research by Leplae *et al.*, 2011 (1), as well as gene pairs that were validated in this research. Other TA pairs that were suggested to form unique TA families were added from references at TADB ([http://bioinfo-mml.sjtu.edu.cn/TADB/browse\\_fam.php](http://bioinfo-mml.sjtu.edu.cn/TADB/browse_fam.php)) (2).

**Table S3.** The list of *A. baumannii* DNA sequences\* subjected to bioinformatic search.

| Chromosomes | Plasmids                                                   | Phages                                           |
|-------------|------------------------------------------------------------|--------------------------------------------------|
|             |                                                            | 133; Ac42; Acj9; Acj61; AP205; AB1; phiAB1; ZZ1. |
| ATCC17978   | pAB1; pAB2.                                                |                                                  |
| 1656-2      | ABKp1; ABKp2.                                              |                                                  |
| TCDC-AB0057 | p1ABTCDC0715; p2ABTCDC0715.                                |                                                  |
| AB0057      | pAB0057                                                    |                                                  |
| AB307-0294  |                                                            |                                                  |
| ACICU       | pACICU1; pACICU2                                           |                                                  |
| AYE         | p1ABAYE; p2ABAYE; p3ABAYE; p4ABAYE.                        |                                                  |
| MDR-TJ      | pABTJ1                                                     |                                                  |
| MDR-ZJ06    | pMDR-ZJ06                                                  |                                                  |
| SDF         | p1ABSDF; p2ABSDF; p3ABSDF.                                 |                                                  |
| TYTH-1      |                                                            |                                                  |
|             | pAB120; pABIR; pAbSK-OXA-82; pABVA01; pMAC; pMMA2; pMMCU3. |                                                  |

\**A. baumannii* chromosomes, plasmids and *Acinetobacter* phages, which were used in this work were downloaded from NCBI database. Our bioinformatic search included completed genomes suitable for search with RASTA tool.

**Table S4.** The list of GI codes of validated and estimated *A. baumannii* TA systems.

| <b>Toxin</b>         | <b>Antitoxin</b>      | <b>Chromosome/plasmid</b> | <b>Toxin GI</b>               | <b>Antitoxin GI</b>  |
|----------------------|-----------------------|---------------------------|-------------------------------|----------------------|
| <b>RelE</b>          | <b>RelB</b>           | ACICU                     | 184158489                     | 184158490            |
|                      |                       | MDR-ZJ06                  | 384142221                     | 384142220            |
|                      |                       | TCDC-AB0715               | 345447463:<br>1041311-1041577 | 385236512            |
|                      |                       | TCDC-AB0715               | 345447463:<br>2523828-2524094 | 385237910            |
|                      |                       | TYTH1                     | 407931855                     | 407931854            |
|                      |                       | pACICU1                   | 184159998                     | 184159997            |
| <b>HicA</b>          | <b>HicB</b>           | 1656-2                    | 384131513                     | 384131514            |
|                      |                       | 1656-2                    | 384132583                     | 384132582            |
|                      |                       | ATCC17978                 | 126642065                     | 126642064            |
|                      |                       | MDR-ZJ06                  | 384143590                     | 384143589            |
|                      |                       | ACICU                     | 184159046                     | 184159045            |
|                      |                       | TCDC-AB0715               | 345447463:<br>2942160-2942342 | 385238300            |
|                      |                       | MDR-TJ                    | 387123027                     | 387123028            |
|                      |                       | pABIR                     | 169949436:<br>24764-24943     | 170780400            |
| <b>GP49 (HigB)</b>   | <b>Cro (HigA)</b>     | pAB1                      | 126640106                     | 126640105            |
|                      |                       | pAB120                    | 398359516                     | 398359515            |
|                      |                       | pMAC                      | 61199614                      | 61199615             |
|                      |                       | ABKp1                     | 384133689                     | 384133688            |
|                      |                       | p2ABTCDC0715              | 385239490                     | 385239489            |
|                      |                       | p3ABAYE                   | 169786925                     | 169786926            |
|                      |                       | p3ABAYE                   | 169786931                     | 169786930            |
| <b>DUF497 (SplT)</b> | <b>COG3514 (SplA)</b> | ABKp2                     | 384133676: 1522-1818          | 384133680            |
|                      |                       | p1ABTCDC0715              | 385239408                     | 385239409            |
|                      |                       | p2ABAYE                   | 169302985                     | 169302986            |
|                      |                       | pAB0057                   | 213155362                     | 213155363            |
|                      |                       | pAB120                    | 398359521                     | 398359520            |
|                      |                       | pAB2                      | 126373843: 5471-5767          | 126373843: 5760-6068 |
|                      |                       | pABIR                     | 170780380                     | 170780381            |
|                      |                       | pABVA01                   | 240887309                     | 240887310            |
|                      |                       | pMMA2                     | 260414705                     | 260414704            |
|                      |                       | pMMCUC3                   | 410687673                     | 410687672            |

|                   |                    |              |                                                    |                      |
|-------------------|--------------------|--------------|----------------------------------------------------|----------------------|
| <b>HTH (CheT)</b> | <b>GNAT (CheA)</b> | 1656-2       | 384131381                                          | 384131380            |
|                   |                    | AB0057       | 213158500                                          | 213158502            |
|                   |                    | AB307-0294   | 215483046                                          | 215483045            |
|                   |                    | ACICU        | 184158635                                          | 184158636            |
|                   |                    | ATCC17978    | 126642163                                          | 126642164            |
|                   |                    | AYE          | 169795559                                          | 169795558            |
|                   |                    | MDR-TJ       | 387123449                                          | 387123448            |
|                   |                    | SDF          | 169633281                                          | 169633280            |
|                   |                    | TCDC-AB0715  | 385238053                                          | 385238054            |
|                   |                    | TYTH1        | 407933243                                          | 407933244            |
|                   | MDR-ZJ06           | 347594209    | 384141246;<br>2530802-2531044;<br>2531001-2531207; |                      |
| <b>Zeta</b>       | <b>X</b>           | ABKp1        | 384133754                                          | 384133753            |
|                   |                    | p2ABTCDC0715 | 385239451                                          | 385239450            |
|                   |                    | pAbSK-OXA-82 | 255076963                                          | 255076961: 1442-1681 |
|                   |                    | pABTJ1       | 387125817-387125816                                | 387125818            |
|                   |                    | pACICU2      | 184160019-184160020                                | 183211611: 1443-1682 |
| <b>RelE 2</b>     | <b>RelB2</b>       | p3ABAYE      | 169786924                                          | 169786923            |
|                   |                    | pAB2         | 126373843: 2549-2842                               | 126373843: 2314-2559 |
| <b>YoeB</b>       | <b>Phd</b>         | p1ABAYE      | 169302977                                          | 169302976            |
| <b>YafQ</b>       | <b>RelB</b>        | p2ABSDF      | 169786858                                          | 169786859            |
| <b>HicA 2</b>     | <b>HicB 2</b>      | SDF          | 169634247                                          | 169634248            |
| <b>HipA</b>       | <b>HipB</b>        | ATCC17978    | 193077387                                          | 193077386            |
|                   |                    | SDF          | 169632029: 1806022-1806927                         | 169633561            |
| <b>HipA 2</b>     | <b>HipB 2</b>      | p3ABAYE      | 169786889: 89791-90321; 90131-91042                | 169786969            |
| <b>DUF1044</b>    | <b>RelB</b>        | pABIR        | 170780395                                          | 170780396            |
| <b>GP49</b>       | <b>HTH</b>         | p3ABAYE      | 169786952                                          | 169786953            |
| <b>HTH 2</b>      | <b>GNAT 2</b>      | 1656-2       | 384131976                                          | 384131977            |
|                   |                    | AB0057       | 213157074                                          | 213157075            |
|                   |                    | AB307-0294   | 215483646                                          | 215483645            |
|                   |                    | ACICU        | 184157878                                          | 184157879            |
|                   |                    | AYE          | 169796192                                          | 169796191            |
|                   |                    | MDR-TJ       | 387124163                                          | 387124162            |

|             |           |           |
|-------------|-----------|-----------|
| MDR-ZJ06    | 384142966 | 384142967 |
| SDF         | 169633695 | 169633694 |
| TCDC-AB0715 | 385237297 | 385237298 |
| TYTH1       | 407932590 | 407932591 |
| ATCC17978   | 126641560 | 126641561 |

---

## References:

1. **Leplae R, Geeraerts D, Hallez R, Guglielmini J, Drèze P, Van Melderen L.** 2011. Diversity of bacterial type II toxin-antitoxin systems: a comprehensive search and functional analysis of novel families. *Nucleic Acids Res.* **39**:5513-5525.
2. **Shao Y, Harrison EM, Bi D, Tai C, He X, Ou HY, Rajakumar K, Deng Z.** 2011. TADB: a web-based resource for Type 2 toxin-antitoxin loci in bacteria and archaea. *Nucleic Acids Res.* **39**:D606-611.
